# Supplementary material
Source: PubMed Central journal article supplement (PMC3302364)
Supplement: supp_95.4.892_ajcn020156_T1.pdf [file supp_95.4.892_ajcn020156_T1.pdf]

Supplementary Table 1. Summary of patient selection, inclusion criteria, and exclusion criteria for the three studies from which subjects were selected. For further details please see cited reference.

|                  | Patient Selection                                                                                                                                                                                                                                                                                                                                        | Inclusion Criteria                                                                                                                                                                                                                                                                                                                                               | ExclusionCriteria                                                                                                                                                                                                                                                                                                                                                                                                                                                                                                                                                                                                            |
|------------------|----------------------------------------------------------------------------------------------------------------------------------------------------------------------------------------------------------------------------------------------------------------------------------------------------------------------------------------------------------|------------------------------------------------------------------------------------------------------------------------------------------------------------------------------------------------------------------------------------------------------------------------------------------------------------------------------------------------------------------|------------------------------------------------------------------------------------------------------------------------------------------------------------------------------------------------------------------------------------------------------------------------------------------------------------------------------------------------------------------------------------------------------------------------------------------------------------------------------------------------------------------------------------------------------------------------------------------------------------------------------|
| Database (24,25) | <ul style="list-style-type: none"> <li>• Patients with suspected or histologically proven NAFLD</li> <li>• <math>\geq 2</math> years of age</li> <li>• Enrollment: 10/2004 -2/2008</li> <li>• Subjects were followed until 9/2009.</li> <li>• 1,206 adults and 296 children</li> <li>• Liver biopsies obtained only when clinically indicated</li> </ul> | <p>Any one of the following criteria:</p> <ul style="list-style-type: none"> <li>• Histologic diagnosis of NAFLD</li> <li>• Histologic diagnosis of cryptogenic cirrhosis</li> <li>• Suspected NAFLD based on imaging studies</li> <li>• Clinical evidence of cryptogenic cirrhosis.</li> </ul>                                                                  | <ul style="list-style-type: none"> <li>• Clinical or histological evidence of alcoholic liver disease</li> <li>• Alcohol consumption during the 2 years before entry of more than 20 g daily for men and 10 g daily for women.</li> <li>• Other forms of chronic liver disease</li> <li>• History of total parenteral nutrition, biliopancreatic diversion, bariatric surgery, Short bowel syndrome, suspected or confirmed hepatocellular carcinoma</li> <li>• Known positive for HIV</li> <li>• Conditions that were likely to interfere with study follow-up</li> <li>• Inability to provide informed consent.</li> </ul> |
| PIVENS (26,27)   | <ul style="list-style-type: none"> <li>• <math>\geq 18</math> years of age</li> <li>• Enrolment: 1/2005 - 1/2007</li> <li>• 247 adults (includes 162 patients subsequently enrolled in Database study at the completion of the trial)</li> <li>• Eligibility based on standard of care tests and procedures</li> </ul>                                   | <p>Liver biopsy within 6 months before randomization showing either:</p> <ul style="list-style-type: none"> <li>• NAS <math>\geq 5</math> with a minimum score of 1 for all three components plus possible or definite steatohepatitis</li> <li>• NAS=4 with a minimum score of 1 for all three components plus a finding of definite steatohepatitis</li> </ul> | <ul style="list-style-type: none"> <li>• Exclusion as Database Study above plus:</li> <li>• Medications suspected of having an effect on NASH in the 3 months before the biopsy,</li> <li>• History of diabetes mellitus or heart failure</li> <li>• Evidence of cirrhosis</li> <li>• Use of drugs historically associated with NAFLD or known hepatotoxins</li> </ul>                                                                                                                                                                                                                                                       |
| TONIC (28,29)    | <ul style="list-style-type: none"> <li>• 8 - 17 years of age at entry</li> <li>• Enrollment 9/2005 – 9/2007</li> <li>• 173 children (includes 78 patients subsequently enrolled in Database study at the completion of the trial)</li> <li>• Eligibility based on standard of care tests and procedures</li> </ul>                                       | <ul style="list-style-type: none"> <li>• Serum ALT elevation (<math>&gt; 60</math> U/L) on two occasions more than 30 days but less than one year apart</li> <li>• Liver biopsy indicating NAFLD obtained within 6 months before randomization (defined as a minimum of 5% of hepatocytes with macrovesicular fat, without other etiologies )</li> </ul>         | <ul style="list-style-type: none"> <li>• Exclusion as Database Study above plus:</li> <li>• Medications suspected of having an effect on NASH in the 3 months before the biopsy,</li> <li>• History of diabetes mellitus</li> <li>• Evidence of cirrhosis</li> <li>• Normal ALT</li> <li>• Lack of liver biopsy within the designated time</li> <li>• Use of drugs historically associated with causing NAFLD or known hepatotoxins</li> </ul>                                                                                                                                                                               |
